# Supplementary material
Source: publisher figshare collection journal article supplement (https://acs.figshare.com/ndownloader/files/4370809)
Supplement: Supplementary file 1 [file 4370809]

## Supplementary materials

### Chemical Characterization and Quality Control of the TCM Mixtures Used in the Study

All the TCM mixtures were under careful quality control to assure their identity throughout all the experiments. Each TCM mixture was prepared in a single extraction and the dried extracts were well stored as the supply of test materials for animal experiments and chemical analysis.

Water extract powder of *salvia miltiorrhiza* (20 mg), *panax ginseng* (20 mg) and *shuanglong* formula (20 mg) were dissolved in 5 mL of water, respectively. The solutions were filtered through a 0.45 µm filter membrane and the filtrates were used as test solution. 4 µL of test solution was injected into the column in each run.

Chromatographic separation was performed on an Acquity UPLC BEH C<sub>18</sub> column (2.1×100 mm, 1.7 µm, Waters Corp., Milford, USA) using an ACQUITY™ UPLC system (Waters), equipped with a binary solvent delivery system, an autosampler, and a PDA detector. The column was maintained at 50 °C and eluted at a flow rate of 0.4 mL/min, using a mobile phase of (A) 0.1% (by volume) formic acid in water and (B) acetonitrile. The gradient program was optimized as follows: 0-4 min, 5% B to 5%B; 4-9 min, 5% B to 50% B; 9-19 min, 50% B to 90% B; 19-20 min, 90% B to 90% B; 20-22 min, 90% B to 5% B; 22-28 min, equilibration with 5% B. The column eluent was directly inducted into the mass spectrometer without split.

Mass spectrometry was performed on a Waters LCT Premier orthogonal accelerated time of flight mass spectrometer (Waters, Millford, MA) with an electrospray ionization source (ESI) operating in negative ion mode (W mode of operation). The capillary voltage and the cone voltage were set at 2200 V and 35 V, respectively. Nitrogen was used as the drying gas. The desolvation gas rate was set to 700 L/h at a temperature of 350 °C, and the cone gas rate was set at 40 L/h and the source temperature was set at 120 °C. The scan time and inter-scan delay were set to 0.2 s and 0.02 s, respectively. Data was collected in centroid mode from m/z 100 to m/z 1500 with a LockSpray frequency of 10 s, and data averaging over 10 scans. The total ion

chromatograms of test solutions prepared from selected TCM materials were shown in **Figure S1-S3**.

As a result, seventy seven compounds of *shuanglong* formula (SLF) were identified on the basis of retention time, m/z and available conference standards (shown in **Table S1**), among which twenty six compounds were from *salvia miltiorrhiza* (shown in **Table S2**) and fifty one compounds from *panax ginseng* (shown in **Table S3**). For the quality control, eighteen major components among the TCM mixture SLF were assayed with external standard calibrations, and the other components were estimated with their peak areas.

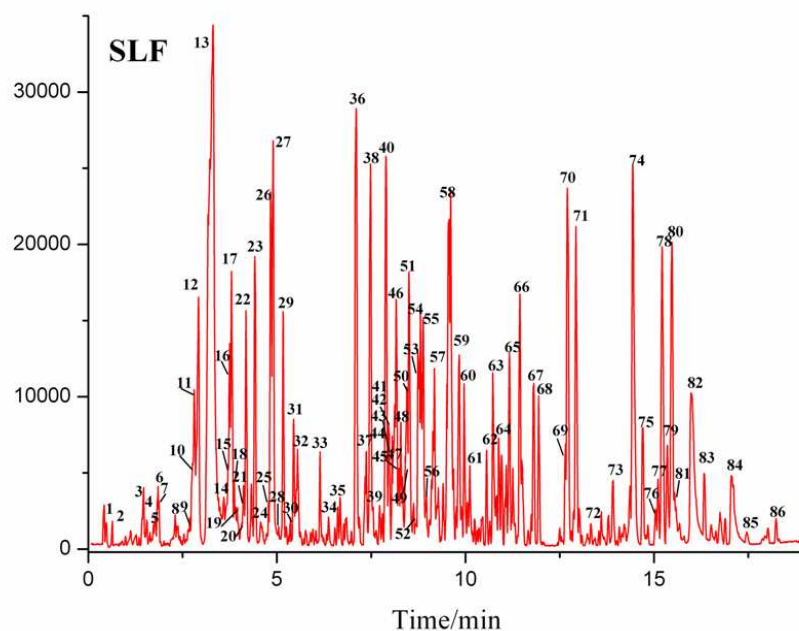

Figure S1 The total ion chromatogram of *shuanglong* formula (SLF) on UPLC/TOF MS

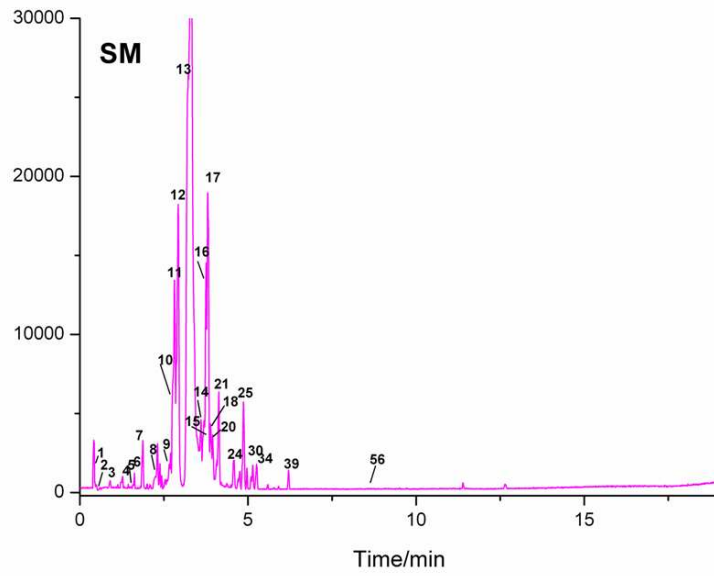

Figure S2 The total ion chromatogram of *salvia miltiorrhiza* (SM) on UPLC/TOF MS

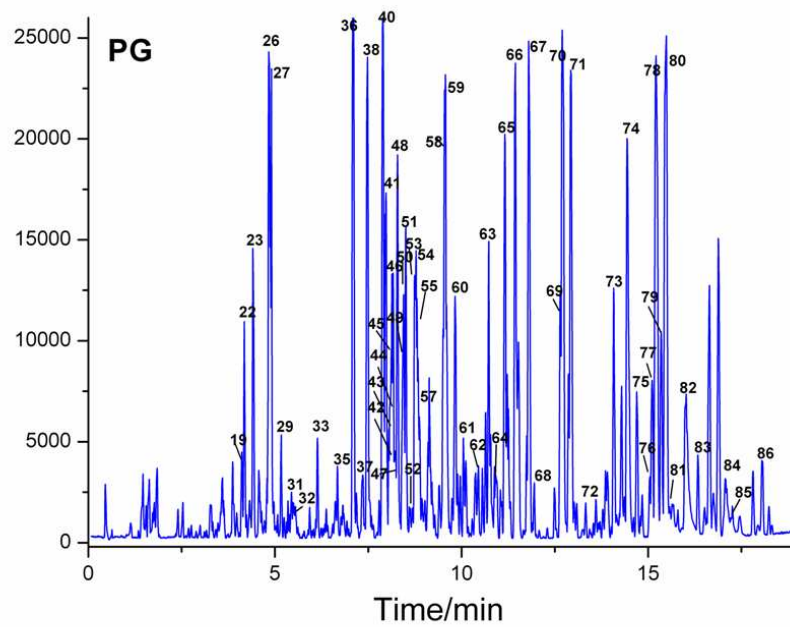

Figure S3 The total ion chromatogram of *panax ginseng* (PG) on UPLC/TOF MS

**Table S1 Identification and quantitative assay of major components of *shuanglong* formula used in the study**

| NO. | R.T.(min) | Selected ion          | m/z       | Elemental composition                            | Identified result                          | content (mg/g) |
|-----|-----------|-----------------------|-----------|--------------------------------------------------|--------------------------------------------|----------------|
| 1*  | 0.54      | [M-H] <sup>-</sup>    | 197.0272  | C <sub>9</sub> H <sub>10</sub> O <sub>5</sub>    | 3-(3,4-dihydroxyphenyl) lactic acid        | 0.22           |
| 2   | 0.64      | [M-H] <sup>-</sup>    | 313.0923  | C <sub>17</sub> H <sub>14</sub> O <sub>6</sub>   | salvianolic acid F                         | —              |
| 3   | 1.26      | [M-H] <sup>-</sup>    | 137.0224  | C <sub>7</sub> H <sub>6</sub> O <sub>3</sub>     | protocatechuic aldehyde                    | —              |
| 4   | 1.55      |                       | 383.0956  |                                                  | not determined                             | —              |
| 5   | 1.62      | [M+HCOO] <sup>-</sup> | 315.1078  | C <sub>16</sub> H <sub>14</sub> O <sub>4</sub>   | isoimperatrin                              | —              |
| 6   | 1.83      | [M-H] <sup>-</sup>    | 417.1034  | C <sub>20</sub> H <sub>18</sub> O <sub>10</sub>  | salvianolic acid D                         | —              |
| 7   | 1.87      | [M-H] <sup>-</sup>    | 371.0975  | C <sub>19</sub> H <sub>16</sub> O <sub>8</sub>   | salvianolic acid M                         | —              |
| 8   | 2.31      | [M-H] <sup>-</sup>    | 537.1421  | C <sub>27</sub> H <sub>22</sub> O <sub>12</sub>  | salvianolic acid H                         | —              |
| 9   | 2.7       | [M-H] <sup>-</sup>    | 555.1463  | C <sub>27</sub> H <sub>24</sub> O <sub>13</sub>  | salvianolic acid K                         | —              |
| 10  | 2.8       | [M-H] <sup>-</sup>    | 537.1498  | C <sub>27</sub> H <sub>22</sub> O <sub>12</sub>  | salvianolic acid I                         | —              |
| 11  | 2.8       | [M-H] <sup>-</sup>    | 717.2053  | C <sub>36</sub> H <sub>30</sub> O <sub>16</sub>  | salvianolic acid L                         | —              |
| 12* | 2.91      | [M-H] <sup>-</sup>    | 359.1027  | C <sub>18</sub> H <sub>16</sub> O <sub>8</sub>   | rosmarinic acid                            | 0.38           |
| 13* | 3.3       | [M-H] <sup>-</sup>    | 717.2090  | C <sub>36</sub> H <sub>30</sub> O <sub>16</sub>  | salvianolic acid B                         | 6.34           |
| 14  | 3.43      | [M-H] <sup>-</sup>    | 537.1498  | C <sub>27</sub> H <sub>22</sub> O <sub>12</sub>  | salvianolic acid J                         | —              |
| 15  | 3.69      | [M-H] <sup>-</sup>    | 445.0963  | C <sub>21</sub> H <sub>18</sub> O <sub>11</sub>  | baicalin                                   | —              |
| 16* | 3.71      | [M-H] <sup>-</sup>    | 491.1032  | C <sub>26</sub> H <sub>22</sub> O <sub>10</sub>  | salvianolic acid C                         | 0.63           |
| 17  | 3.8       | [M-H] <sup>-</sup>    | 717.2072  | C <sub>36</sub> H <sub>30</sub> O <sub>16</sub>  | salvianolic acid E                         | —              |
| 18  | 3.87      | [M-H] <sup>-</sup>    | 455.3541  | C <sub>30</sub> H <sub>48</sub> O <sub>3</sub>   | ursolic acid                               | —              |
| 19  | 3.87      | [M+HCOO] <sup>-</sup> | 831.4751  | C <sub>41</sub> H <sub>70</sub> O <sub>14</sub>  | ginsenoside F <sub>4</sub>                 | —              |
| 20  | 4.06      | [M+HCOO] <sup>-</sup> | 419.0966  | C <sub>19</sub> H <sub>18</sub> O <sub>8</sub>   | methyl rosmarinate                         | —              |
| 21  | 4.12      | [M-H] <sup>-</sup>    | 731.2222  | C <sub>37</sub> H <sub>32</sub> O <sub>16</sub>  | 9'-methyl lithospermate B                  | —              |
| 22  | 4.17      | [M+HCOO] <sup>-</sup> | 1007.6335 | C <sub>48</sub> H <sub>82</sub> O <sub>19</sub>  | 20-gluco-ginsenoside Rf                    | —              |
| 23  | 4.41      | [M+HCOO] <sup>-</sup> | 977.5273  | C <sub>47</sub> H <sub>80</sub> O <sub>18</sub>  | notoginsenoside R <sub>1</sub>             | —              |
| 24* | 4.59      | [M+HCOO] <sup>-</sup> | 537.1498  | C <sub>27</sub> H <sub>22</sub> O <sub>12</sub>  | lithospermic acid                          | 0.55           |
| 25* | 4.77      | [M-H] <sup>-</sup>    | 493.1253  | C <sub>26</sub> H <sub>22</sub> O <sub>10</sub>  | salvianolic acid A                         | 0.55           |
| 26* | 4.83      | [M+HCOO] <sup>-</sup> | 991.5528  | C <sub>48</sub> H <sub>82</sub> O <sub>18</sub>  | ginsenoside Re                             | 0.44           |
| 27* | 4.89      | [M+HCOO] <sup>-</sup> | 845.5647  | C <sub>42</sub> H <sub>72</sub> O <sub>14</sub>  | ginsenoside Rf                             | 0.17           |
| 28  | 4.9       | [M+HCOO] <sup>-</sup> | 459.3927  | C <sub>29</sub> H <sub>50</sub> O                | β-sitosterol                               | —              |
| 29  | 5.16      | [M-H] <sup>-</sup>    | 885.5041  | C <sub>45</sub> H <sub>74</sub> O <sub>17</sub>  | ginsenoside malonyl-Rg <sub>1</sub>        | —              |
| 30  | 5.25      | [M-H] <sup>-</sup>    | 491.0979  | C <sub>19</sub> H <sub>16</sub> O <sub>8</sub>   | isosalvianolic acid C                      | —              |
| 31* | 5.44      | [M-H] <sup>-</sup>    | 1031.5356 | C <sub>51</sub> H <sub>84</sub> O <sub>21</sub>  | ginsenoside malonyl-Rd                     | 0.072          |
| 32  | 5.55      | [M-H] <sup>-</sup>    | 885.5643  | C <sub>45</sub> H <sub>74</sub> O <sub>17</sub>  | ginsenoside malonyl-Rg <sub>1</sub> isomer | —              |
| 33  | 6.15      | [M+HCOO] <sup>-</sup> | 815.4805  | C <sub>41</sub> H <sub>70</sub> O <sub>13</sub>  | ginsenoside F <sub>3</sub>                 | —              |
| 34  | 6.38      | [M-H] <sup>-</sup>    | 555.1244  | C <sub>27</sub> H <sub>24</sub> O <sub>13</sub>  | dimethyl salvianolate B                    | —              |
| 35  | 6.67      |                       | 1033.6500 |                                                  | not determined                             | —              |
| 36* | 7.09      | [M+HCOO] <sup>-</sup> | 845.5662  | C <sub>42</sub> H <sub>72</sub> O <sub>14</sub>  | ginsenoside Rg <sub>1</sub>                | 3.39           |
| 37  | 7.33      | [M+HCOO] <sup>-</sup> | 1285.6573 | C <sub>59</sub> H <sub>100</sub> O <sub>27</sub> | notoginsenoside R <sub>4</sub>             | —              |
| 38  | 7.47      | [M+HCOO] <sup>-</sup> | 815.5520  | C <sub>41</sub> H <sub>70</sub> O <sub>13</sub>  | notoginsenoside R <sub>2</sub>             | —              |

|     |       |                       |           |                                                  |                                     |       |
|-----|-------|-----------------------|-----------|--------------------------------------------------|-------------------------------------|-------|
| 39  | 7.56  | [M-H] <sup>-</sup>    | 329.2471  | C <sub>20</sub> H <sub>26</sub> O <sub>4</sub>   | salviol                             | —     |
| 40  | 7.88  | [M+HCOO] <sup>-</sup> | 829.5691  | C <sub>42</sub> H <sub>72</sub> O <sub>13</sub>  | ginsenoside Rg <sub>2</sub>         | —     |
| 41  | 7.9   | [M+HCOO] <sup>-</sup> | 815.4859  | C <sub>41</sub> H <sub>70</sub> O <sub>13</sub>  | ginsenoside F <sub>5</sub>          | —     |
| 42  | 7.94  | [M+HCOO] <sup>-</sup> | 1255.6456 | C <sub>58</sub> H <sub>98</sub> O <sub>26</sub>  | ginsenoside Ra <sub>1</sub>         | —     |
| 43  | 7.97  | [M+HCOO] <sup>-</sup> | 683.4987  | C <sub>36</sub> H <sub>62</sub> O <sub>9</sub>   | ginsenoside Rh <sub>1</sub>         | —     |
| 44  | 8.05  | [M+HCOO] <sup>-</sup> | 1285.7575 | C <sub>59</sub> H <sub>100</sub> O <sub>27</sub> | ginsenoside Ra <sub>3</sub>         | —     |
| 45* | 8.11  | [M+HCOO] <sup>-</sup> | 1153.7021 | C <sub>54</sub> H <sub>92</sub> O <sub>23</sub>  | ginsenoside Rb <sub>1</sub>         | 1.12  |
| 46* | 8.15  | [M-H] <sup>-</sup>    | 1193.7024 | C <sub>57</sub> H <sub>94</sub> O <sub>26</sub>  | ginsenoside malonyl-Rb <sub>1</sub> | 0.27  |
| 47  | 8.18  | [M+HCOO] <sup>-</sup> | 1165.6365 | C <sub>55</sub> H <sub>92</sub> O <sub>23</sub>  | ginsenoside Rs <sub>2</sub>         | —     |
| 48* | 8.27  | [M+HCOO] <sup>-</sup> | 1001.5022 | C <sub>49</sub> H <sub>80</sub> O <sub>18</sub>  | ginsenoside R <sub>0</sub>          | 0.59  |
| 49  | 8.28  | [M+HCOO] <sup>-</sup> | 683.4992  | C <sub>36</sub> H <sub>62</sub> O <sub>9</sub>   | ginsenoside F <sub>1</sub>          | —     |
| 50  | 8.42  | [M+HCOO] <sup>-</sup> | 1255.6363 | C <sub>58</sub> H <sub>98</sub> O <sub>26</sub>  | ginsenoside Ra <sub>2</sub>         | —     |
| 51* | 8.47  | [M+HCOO] <sup>-</sup> | 1123.5933 | C <sub>53</sub> H <sub>90</sub> O <sub>22</sub>  | ginsenoside Rb <sub>2</sub>         | 3.99  |
| 52* | 8.5   | [M-H] <sup>-</sup>    | 1163.5982 | C <sub>56</sub> H <sub>92</sub> O <sub>25</sub>  | ginsenoside malonyl-Rb <sub>2</sub> | 1.41  |
| 53  | 8.77  | [M+HCOO] <sup>-</sup> | 1123.5909 | C <sub>53</sub> H <sub>90</sub> O <sub>22</sub>  | ginsenoside Rb <sub>3</sub>         | —     |
| 54* | 8.8   | [M+HCOO] <sup>-</sup> | 1123.5868 | C <sub>53</sub> H <sub>90</sub> O <sub>22</sub>  | ginsenoside Rc                      | 0.54  |
| 55* | 8.88  | [M-H] <sup>-</sup>    | 1163.5994 | C <sub>56</sub> H <sub>92</sub> O <sub>25</sub>  | ginsenoside malonyl-Rc              | 0.099 |
| 56  | 8.96  | [M-H] <sup>-</sup>    | 339.0806  | C <sub>18</sub> H <sub>12</sub> O <sub>7</sub>   | salvianolic acid G                  | —     |
| 57  | 9.16  | [M+HCOO] <sup>-</sup> | 1195.6102 | C <sub>56</sub> H <sub>94</sub> O <sub>24</sub>  | panas quinquefolium R <sub>1</sub>  | —     |
| 58  | 9.5   | [M+HCOO] <sup>-</sup> | 1165.7053 | C <sub>55</sub> H <sub>92</sub> O <sub>23</sub>  | ginsenoside Rs <sub>1</sub>         | —     |
| 59* | 9.56  | [M+HCOO] <sup>-</sup> | 991.5594  | C <sub>48</sub> H <sub>82</sub> O <sub>18</sub>  | ginsenoside Rd                      | 0.26  |
| 60  | 9.82  |                       | 503.2664  |                                                  | not determined                      | —     |
| 61  | 10.1  | [M+HCOO] <sup>-</sup> | 991.5609  | C <sub>48</sub> H <sub>82</sub> O <sub>18</sub>  | Rd isomer                           | —     |
| 62  | 10.56 | [M-H] <sup>-</sup>    | 961.5531  | C <sub>48</sub> H <sub>82</sub> O <sub>19</sub>  | 20-gluco-ginsenoside Rf<br>isomer   | —     |
| 63  | 10.72 |                       | 1033.5769 |                                                  | not determined                      | —     |
| 64  | 10.91 |                       | 961.6228  |                                                  | not determined                      | —     |
| 65  | 11.16 | [M+HCOO] <sup>-</sup> | 811.5568  | C <sub>42</sub> H <sub>70</sub> O <sub>12</sub>  | ginsenoside Rg <sub>4</sub>         | —     |
| 66  | 11.43 | [M+HCOO] <sup>-</sup> | 811.5567  | C <sub>42</sub> H <sub>70</sub> O <sub>12</sub>  | ginsenoside Rg <sub>5</sub>         | —     |
| 67  | 11.81 |                       | 665.4831  |                                                  | not determined                      | —     |
| 68  | 11.96 | [M+HCOO] <sup>-</sup> | 829.488   | C <sub>42</sub> H <sub>72</sub> O <sub>13</sub>  | Rg <sub>2</sub> isomer              | —     |
| 69  | 12.62 | [M+HCOO] <sup>-</sup> | 505.3546  | C <sub>30</sub> H <sub>52</sub> O <sub>3</sub>   | protopanaxadiol                     | —     |
| 70  | 12.7  | [M+HCOO] <sup>-</sup> | 829.5677  | C <sub>42</sub> H <sub>72</sub> O <sub>13</sub>  | ginsenoside F <sub>2</sub>          | —     |
| 71  | 12.92 | [M+HCOO] <sup>-</sup> | 829.5697  | C <sub>42</sub> H <sub>72</sub> O <sub>13</sub>  | ginsenoside Rg <sub>3</sub>         | —     |
| 72  | 13.32 | [M+HCOO] <sup>-</sup> | 799.4894  | C <sub>41</sub> H <sub>70</sub> O <sub>12</sub>  | ginsenoside Mc                      | —     |
| 73  | 13.91 |                       | 595.2895  |                                                  | not determined                      | —     |
| 74  | 14.43 |                       | 1191.5946 |                                                  | not determined                      | —     |
| 75  | 14.69 |                       | 723.4442  |                                                  | not determined                      | —     |
| 76  | 15.03 | [M+HCOO] <sup>-</sup> | 667.4415  | C <sub>36</sub> H <sub>62</sub> O <sub>8</sub>   | ginsenoside Rh <sub>2</sub>         | —     |
| 77  | 15.11 | [M+HCOO] <sup>-</sup> | 851.4934  | C <sub>51</sub> H <sub>98</sub> O <sub>6</sub>   | tripalmitin                         | —     |
| 78  | 15.21 | [M+HCOO] <sup>-</sup> | 811.4869  | C <sub>42</sub> H <sub>70</sub> O <sub>12</sub>  | ginsenoside Rg <sub>6</sub>         | —     |
| 79  | 15.43 | [M+HCOO] <sup>-</sup> | 649.3914  | C <sub>36</sub> H <sub>60</sub> O <sub>7</sub>   | ginsenoside Rh <sub>3</sub>         | —     |
| 80  | 15.48 | [M+HCOO] <sup>-</sup> | 811.4849  | C <sub>42</sub> H <sub>70</sub> O <sub>12</sub>  | ginsenoside Rk <sub>1</sub>         | —     |
| 81  | 15.58 | [M+HCOO] <sup>-</sup> | 667.4438  | C <sub>36</sub> H <sub>62</sub> O <sub>8</sub>   | Compound K                          | —     |

|    |       |                       |           |                                                 |  |                             |   |
|----|-------|-----------------------|-----------|-------------------------------------------------|--|-----------------------------|---|
| 82 | 15.97 |                       | 433.2725  |                                                 |  | not determined              | — |
| 83 | 16.33 | [M+HCOO] <sup>-</sup> | 625.2377  | C <sub>28</sub> H <sub>36</sub> O <sub>13</sub> |  | eleatheroside B             | — |
| 84 | 17.08 | [M-H] <sup>-</sup>    | 455.2816  | C <sub>30</sub> H <sub>48</sub> O <sub>3</sub>  |  | oleanolic acid              | — |
| 85 | 17.46 | [M+HCOO] <sup>-</sup> | 461.26677 | C <sub>27</sub> H <sub>44</sub> O <sub>3</sub>  |  | tigogenin                   | — |
| 86 | 18.22 | [M+HCOO] <sup>-</sup> | 649.4343  | C <sub>36</sub> H <sub>60</sub> O <sub>7</sub>  |  | ginsenoside Rk <sub>2</sub> | — |

\* The indicative major components were assayed with external standard calibrations and the other components were estimated and controlled with their peak area.

**Table S2 Identification and quantitative assay of major components of *salvia miltiorrhiza* extract used in the study**

| NO. | R.T.(min) | Selected ion          | m/z      | Elemental composition                           | Identification                      | content (mg/g) |
|-----|-----------|-----------------------|----------|-------------------------------------------------|-------------------------------------|----------------|
| 1*  | 0.54      | [M-H] <sup>-</sup>    | 197.0272 | C <sub>9</sub> H <sub>10</sub> O <sub>5</sub>   | 3-(3,4-dihydroxyphenyl) lactic acid | 0.81           |
| 2   | 0.64      | [M-H] <sup>-</sup>    | 313.0923 | C <sub>17</sub> H <sub>14</sub> O <sub>6</sub>  | salvianolic acid F                  | —              |
| 3   | 1.26      | [M-H] <sup>-</sup>    | 137.0224 | C <sub>7</sub> H <sub>6</sub> O <sub>3</sub>    | protocatechuic aldehyde             | —              |
| 4   | 1.55      | [M-H] <sup>-</sup>    | 383.0956 | C <sub>21</sub> H <sub>20</sub> O <sub>7</sub>  | not determined                      | —              |
| 5   | 1.62      | [M+HCOO] <sup>-</sup> | 315.1078 | C <sub>16</sub> H <sub>14</sub> O <sub>4</sub>  | isoimperatrin                       | —              |
| 6   | 1.83      | [M-H] <sup>-</sup>    | 417.1034 | C <sub>20</sub> H <sub>18</sub> O <sub>10</sub> | salvianolic acid D                  | —              |
| 7   | 1.87      | [M-H] <sup>-</sup>    | 371.0975 | C <sub>19</sub> H <sub>16</sub> O <sub>8</sub>  | salvianolic acid M                  | —              |
| 8   | 2.31      | [M-H] <sup>-</sup>    | 537.1421 | C <sub>27</sub> H <sub>22</sub> O <sub>12</sub> | salvianolic acid H                  | —              |
| 9   | 2.7       | [M-H] <sup>-</sup>    | 555.1463 | C <sub>27</sub> H <sub>24</sub> O <sub>13</sub> | salvianolic acid K                  | —              |
| 10  | 2.8       | [M-H] <sup>-</sup>    | 537.1498 | C <sub>27</sub> H <sub>22</sub> O <sub>12</sub> | salvianolic acid I                  | —              |
| 11  | 2.8       | [M-H] <sup>-</sup>    | 717.2053 | C <sub>36</sub> H <sub>30</sub> O <sub>16</sub> | salvianolic acid L                  | —              |
| 12* | 2.91      | [M-H] <sup>-</sup>    | 359.1027 | C <sub>18</sub> H <sub>16</sub> O <sub>8</sub>  | rosmarinic acid                     | 1.93           |
| 13* | 3.3       | [M-H] <sup>-</sup>    | 717.2090 | C <sub>36</sub> H <sub>30</sub> O <sub>16</sub> | salvianolic acid B                  | 23.69          |
| 14  | 3.43      | [M-H] <sup>-</sup>    | 537.1498 | C <sub>27</sub> H <sub>22</sub> O <sub>12</sub> | salvianolic acid J                  | —              |
| 15  | 3.69      | [M-H] <sup>-</sup>    | 445.0963 | C <sub>21</sub> H <sub>18</sub> O <sub>11</sub> | baicalin                            | —              |
| 16* | 3.71      | [M-H] <sup>-</sup>    | 491.1032 | C <sub>26</sub> H <sub>22</sub> O <sub>10</sub> | salvianolic acid C                  | 2.19           |
| 17  | 3.8       | [M-H] <sup>-</sup>    | 717.2072 | C <sub>36</sub> H <sub>30</sub> O <sub>16</sub> | salvianolic acid E                  | —              |
| 18  | 3.87      | [M-H] <sup>-</sup>    | 455.3541 | C <sub>30</sub> H <sub>48</sub> O <sub>3</sub>  | ursolic acid                        | —              |
| 20  | 4.06      | [M+HCOO] <sup>-</sup> | 419.0966 | C <sub>19</sub> H <sub>18</sub> O <sub>8</sub>  | methyl rosmarinate                  | —              |
| 21  | 4.12      | [M-H] <sup>-</sup>    | 731.2222 | C <sub>37</sub> H <sub>32</sub> O <sub>16</sub> | 9'-methyl lithospermate B           | —              |
| 24* | 4.59      | [M+HCOO] <sup>-</sup> | 537.1498 | C <sub>27</sub> H <sub>22</sub> O <sub>12</sub> | lithospermic acid                   | 2.21           |
| 25* | 4.77      | [M-H] <sup>-</sup>    | 493.1253 | C <sub>26</sub> H <sub>22</sub> O <sub>10</sub> | salvianolic acid A                  | 2.05           |
| 30  | 5.25      | [M-H] <sup>-</sup>    | 491.0979 | C <sub>19</sub> H <sub>16</sub> O <sub>8</sub>  | isosalvianolic acid C               | —              |
| 34  | 6.38      | [M-H] <sup>-</sup>    | 555.1244 | C <sub>27</sub> H <sub>24</sub> O <sub>13</sub> | dimethyl salvianolate B             | —              |
| 39  | 7.56      | [M-H] <sup>-</sup>    | 329.2471 | C <sub>20</sub> H <sub>26</sub> O <sub>4</sub>  | salviol                             | —              |
| 56  | 8.96      | [M-H] <sup>-</sup>    | 339.0806 | C <sub>18</sub> H <sub>12</sub> O <sub>7</sub>  | salvianolic acid G                  | —              |

\* The indicative major components were assayed with external standard calibrations and the other components were estimated and controlled with their peak area.

**Table S3 Identification and quantitative assay of major components of *panax ginseng* extract used in the study**

| NO. | R.T.(min) | Selected ion          | m/z       | Elemental composition                            | Identified result                   | content (mg/g) |
|-----|-----------|-----------------------|-----------|--------------------------------------------------|-------------------------------------|----------------|
| 19  | 3.87      | [M+HCOO] <sup>-</sup> | 831.4751  | C <sub>41</sub> H <sub>70</sub> O <sub>14</sub>  | ginsenoside F <sub>4</sub>          | —              |
| 22  | 4.17      | [M+HCOO] <sup>-</sup> | 1007.6335 | C <sub>48</sub> H <sub>82</sub> O <sub>19</sub>  | 20-gluco-ginsenoside Rf             | —              |
| 23  | 4.41      | [M+HCOO] <sup>-</sup> | 977.5273  | C <sub>47</sub> H <sub>80</sub> O <sub>18</sub>  | notoginsenoside R <sub>1</sub>      | —              |
| 26* | 4.83      | [M+HCOO] <sup>-</sup> | 991.5528  | C <sub>48</sub> H <sub>82</sub> O <sub>18</sub>  | ginsenoside Re                      | 0.61           |
| 27* | 4.89      | [M+HCOO] <sup>-</sup> | 845.5647  | C <sub>42</sub> H <sub>72</sub> O <sub>14</sub>  | ginsenoside Rf                      | 0.23           |
| 28  | 4.9       | [M+HCOO] <sup>-</sup> | 459.3927  | C <sub>29</sub> H <sub>50</sub> O                | β-sitosterol                        | —              |
| 29  | 5.16      | [M-H] <sup>-</sup>    | 885.5041  | C <sub>45</sub> H <sub>74</sub> O <sub>17</sub>  | ginsenoside malonyl-Rg <sub>1</sub> | —              |
| 31* | 5.44      | [M-H] <sup>-</sup>    | 1031.5356 | C <sub>51</sub> H <sub>84</sub> O <sub>21</sub>  | ginsenoside malonyl-Rd              | 0.11           |
| 32  | 5.55      | [M-H] <sup>-</sup>    | 885.5643  | C <sub>45</sub> H <sub>74</sub> O <sub>17</sub>  | ginsenoside alonyl-Rg1 isomer       | —              |
| 33  | 6.15      | [M+HCOO] <sup>-</sup> | 815.4805  | C <sub>41</sub> H <sub>70</sub> O <sub>13</sub>  | ginsenoside F <sub>3</sub>          | —              |
| 35  | 6.67      |                       | 1033.6500 |                                                  | not determined                      | —              |
| 36* | 7.09      | [M+HCOO] <sup>-</sup> | 845.5662  | C <sub>42</sub> H <sub>72</sub> O <sub>14</sub>  | ginsenoside Rg <sub>1</sub>         | 4.64           |
| 37  | 7.33      | [M+HCOO] <sup>-</sup> | 1285.6573 | C <sub>59</sub> H <sub>100</sub> O <sub>27</sub> | notoginsenoside R <sub>4</sub>      | —              |
| 38  | 7.47      | [M+HCOO] <sup>-</sup> | 815.5520  | C <sub>41</sub> H <sub>70</sub> O <sub>13</sub>  | notoginsenoside R <sub>2</sub>      | —              |
| 40  | 7.88      | [M+HCOO] <sup>-</sup> | 829.5691  | C <sub>42</sub> H <sub>72</sub> O <sub>13</sub>  | ginsenoside Rg <sub>2</sub>         | —              |
| 41  | 7.9       | [M+HCOO] <sup>-</sup> | 815.4859  | C <sub>41</sub> H <sub>70</sub> O <sub>13</sub>  | ginsenoside F <sub>5</sub>          | —              |
| 42  | 7.94      | [M+HCOO] <sup>-</sup> | 1255.6456 | C <sub>58</sub> H <sub>98</sub> O <sub>26</sub>  | ginsenoside Ra <sub>1</sub>         | —              |
| 43  | 7.97      | [M+HCOO] <sup>-</sup> | 683.4987  | C <sub>36</sub> H <sub>62</sub> O <sub>9</sub>   | ginsenoside Rh <sub>1</sub>         | —              |
| 44  | 8.05      | [M+HCOO] <sup>-</sup> | 1285.7575 | C <sub>59</sub> H <sub>100</sub> O <sub>27</sub> | ginsenoside Ra <sub>3</sub>         | —              |
| 45* | 8.11      | [M+HCOO] <sup>-</sup> | 1153.7021 | C <sub>54</sub> H <sub>92</sub> O <sub>23</sub>  | ginsenoside Rb <sub>1</sub>         | 1.57           |
| 46* | 8.15      | [M-H] <sup>-</sup>    | 1193.7024 | C <sub>57</sub> H <sub>94</sub> O <sub>26</sub>  | ginsenoside malonyl-Rb <sub>1</sub> | 0.35           |
| 47  | 8.18      | [M+HCOO] <sup>-</sup> | 1165.6365 | C <sub>55</sub> H <sub>92</sub> O <sub>23</sub>  | ginsenoside Rs <sub>2</sub>         | —              |
| 48* | 8.27      | [M+HCOO] <sup>-</sup> | 1001.5022 | C <sub>49</sub> H <sub>80</sub> O <sub>18</sub>  | ginsenoside R <sub>0</sub>          | 0.73           |
| 49  | 8.28      | [M+HCOO] <sup>-</sup> | 683.4992  | C <sub>36</sub> H <sub>62</sub> O <sub>9</sub>   | ginsenoside F <sub>1</sub>          | —              |
| 50  | 8.42      | [M+HCOO] <sup>-</sup> | 1255.6363 | C <sub>58</sub> H <sub>98</sub> O <sub>26</sub>  | ginsenoside Ra <sub>2</sub>         | —              |
| 51* | 8.47      | [M+HCOO] <sup>-</sup> | 1123.5933 | C <sub>53</sub> H <sub>90</sub> O <sub>22</sub>  | ginsenoside Rb <sub>2</sub>         | 5.04           |
| 52* | 8.5       | [M-H] <sup>-</sup>    | 1163.5982 | C <sub>56</sub> H <sub>92</sub> O <sub>25</sub>  | ginsenoside malonyl-Rb <sub>2</sub> | 1.77           |
| 53  | 8.77      | [M+HCOO] <sup>-</sup> | 1123.5909 | C <sub>53</sub> H <sub>90</sub> O <sub>22</sub>  | ginsenoside Rb <sub>3</sub>         | —              |
| 54* | 8.8       | [M+HCOO] <sup>-</sup> | 1123.5868 | C <sub>53</sub> H <sub>90</sub> O <sub>22</sub>  | ginsenoside Rc                      | 0.81           |
| 55* | 8.88      | [M-H] <sup>-</sup>    | 1163.5994 | C <sub>56</sub> H <sub>92</sub> O <sub>25</sub>  | ginsenoside malonyl-Rc              | 0.14           |
| 57  | 9.16      | [M+HCOO] <sup>-</sup> | 1195.6102 | C <sub>56</sub> H <sub>94</sub> O <sub>24</sub>  | panas quinquefolium R <sub>1</sub>  | —              |
| 58  | 9.5       | [M+HCOO] <sup>-</sup> | 1165.7053 | C <sub>55</sub> H <sub>92</sub> O <sub>23</sub>  | ginsenoside Rs <sub>1</sub>         | —              |
| 59* | 9.56      | [M+HCOO] <sup>-</sup> | 991.5594  | C <sub>48</sub> H <sub>82</sub> O <sub>18</sub>  | ginsenoside Rd                      | 0.38           |
| 60  | 9.82      |                       | 503.2664  |                                                  | not determined                      | —              |
| 61  | 10.1      | [M+HCOO] <sup>-</sup> | 991.5609  | C <sub>48</sub> H <sub>82</sub> O <sub>18</sub>  | ginsenoside Rd isomer               | —              |
| 62  | 10.56     | [M-H] <sup>-</sup>    | 961.5531  | C <sub>48</sub> H <sub>82</sub> O <sub>19</sub>  | 20-gluco-ginsenoside Rf isomer      | —              |
| 63  | 10.72     |                       | 1033.5769 |                                                  | not determined                      | —              |
| 64  | 10.91     |                       | 961.6228  |                                                  | not determined                      | —              |

|    |       |                       |           |                                                 |                                    |   |
|----|-------|-----------------------|-----------|-------------------------------------------------|------------------------------------|---|
| 65 | 11.16 | [M+HCOO] <sup>-</sup> | 811.5568  | C <sub>42</sub> H <sub>70</sub> O <sub>12</sub> | ginsenoside Rg <sub>4</sub>        | — |
| 66 | 11.43 | [M+HCOO] <sup>-</sup> | 811.5567  | C <sub>42</sub> H <sub>70</sub> O <sub>12</sub> | ginsenoside Rg <sub>5</sub>        | — |
| 67 | 11.81 |                       | 665.4831  |                                                 | not determined                     | — |
| 68 | 11.96 | [M+HCOO] <sup>-</sup> | 829.488   | C <sub>42</sub> H <sub>72</sub> O <sub>13</sub> | ginsenoside Rg <sub>2</sub> isomer | — |
| 69 | 12.62 | [M+HCOO] <sup>-</sup> | 505.3546  | C <sub>30</sub> H <sub>52</sub> O <sub>3</sub>  | protopanaxadiol                    | — |
| 70 | 12.7  | [M+HCOO] <sup>-</sup> | 829.5677  | C <sub>42</sub> H <sub>72</sub> O <sub>13</sub> | ginsenoside F <sub>2</sub>         | — |
| 71 | 12.92 | [M+HCOO] <sup>-</sup> | 829.5697  | C <sub>42</sub> H <sub>72</sub> O <sub>13</sub> | ginsenoside Rg <sub>3</sub>        | — |
| 72 | 13.32 | [M+HCOO] <sup>-</sup> | 799.4894  | C <sub>41</sub> H <sub>70</sub> O <sub>12</sub> | ginsenoside Mc                     | — |
| 73 | 13.91 |                       | 595.2895  |                                                 | not determined                     | — |
| 74 | 14.43 |                       | 1191.5946 |                                                 | not determined                     | — |
| 75 | 14.69 |                       | 723.4442  |                                                 | not determined                     | — |
| 76 | 15.03 | [M+HCOO] <sup>-</sup> | 667.4415  | C <sub>36</sub> H <sub>62</sub> O <sub>8</sub>  | ginsenoside Rh <sub>2</sub>        | — |
| 77 | 15.11 | [M+HCOO] <sup>-</sup> | 851.4934  | C <sub>51</sub> H <sub>98</sub> O <sub>6</sub>  | tripalmitin                        | — |
| 78 | 15.21 | [M+HCOO] <sup>-</sup> | 811.4869  | C <sub>42</sub> H <sub>70</sub> O <sub>12</sub> | ginsenoside Rg <sub>6</sub>        | — |
| 79 | 15.43 | [M+HCOO] <sup>-</sup> | 649.3914  | C <sub>36</sub> H <sub>60</sub> O <sub>7</sub>  | ginsenoside Rh <sub>3</sub>        | — |
| 80 | 15.48 | [M+HCOO] <sup>-</sup> | 811.4849  | C <sub>42</sub> H <sub>70</sub> O <sub>12</sub> | ginsenoside Rk <sub>1</sub>        | — |
| 81 | 15.58 | [M+HCOO] <sup>-</sup> | 667.4438  | C <sub>36</sub> H <sub>62</sub> O <sub>8</sub>  | Compound K                         | — |
| 82 | 15.97 |                       | 433.2725  |                                                 | not determined                     | — |
| 83 | 16.33 | [M+HCOO] <sup>-</sup> | 625.2377  | C <sub>28</sub> H <sub>36</sub> O <sub>13</sub> | eletheroside B                     | — |
| 84 | 17.08 | [M-H] <sup>-</sup>    | 455.2816  | C <sub>30</sub> H <sub>48</sub> O <sub>3</sub>  | oleanolic acid                     | — |
| 85 | 17.46 | [M+HCOO] <sup>-</sup> | 461.26677 | C <sub>27</sub> H <sub>44</sub> O <sub>3</sub>  | tigogenin                          | — |
| 86 | 18.22 | [M+HCOO] <sup>-</sup> | 649.4343  | C <sub>36</sub> H <sub>60</sub> O <sub>7</sub>  | ginsenoside Rk <sub>2</sub>        | — |

\* The indicative major components were assayed with external standard calibrations and the other components were estimated and controlled with their peak area.



### Supplementary Figure S4

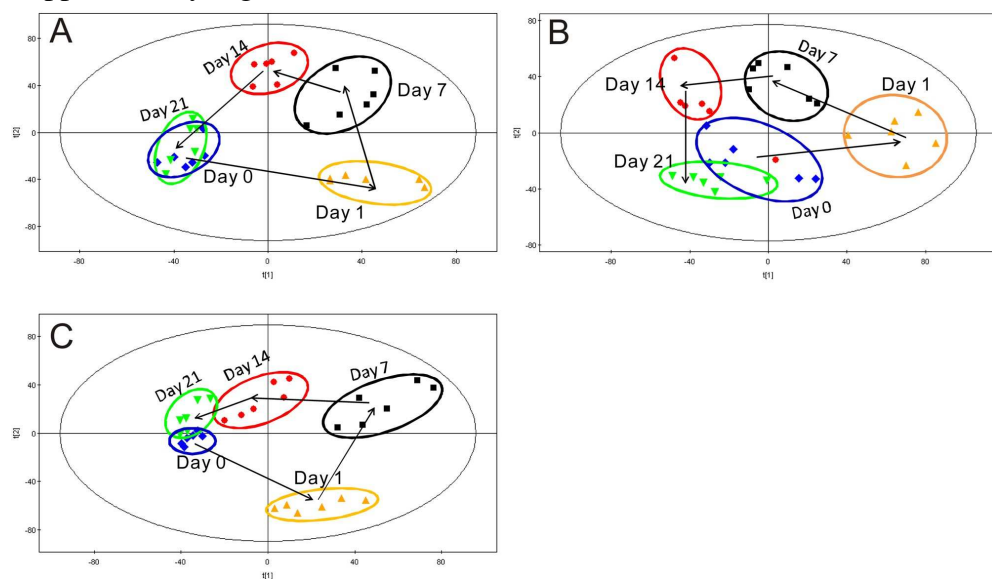

Figure S4 PLS-DA scores plot of non-normalized rat urine data of SLF group (A), SM group (B), PG group (C).

SLFG: SLF group; PGG: PG group; SMG: SM group
